# Supplementary material for: Effects of combination of obesity, diabetes, and hypoxia on inflammatory regulating genes and cytokines in rat pancreatic tissues and serum
Source: PeerJ. 2022 Oct 4;10:e13990. doi: 10.7717/peerj.13990 (PMC9541627; doi:10.7717/peerj.13990)
Supplement: Supplemental Information 1 [file peerj-10-13990-s001.xlsx]

## Sheet: Sheet1
Hematological analysis	Code-Male	CTRL	CTRL	CTRL	HFD	HFD	HFD	STZ	STZ	STZ	HYX	HYX	HYX	HFD/STZ	HFD/STZ	HFD/STZ	HFD/STZ/HYX	HFD/STZ/HYX	HFD/STZ/HYX
	HB - g/dl	12.8	13.6	15.4	10.25	11.52	8.25	10.11	9.05	9.08	9.3	10	8.02	9.5	8.1	7.5	7.11	8.05	8.88
	RBCs /ul	7,020,00	8,810,00	8,500,00	7,950,00	5,500,00	7,210,00	5.000.000	5630000	8650000	5.400.000	5030000	7250000	3820000	4500000	3250000	7.000.00	5,950,00	8050000
	PCV %	0.352	0.304	0.266	0.518	0.493	0.423	0.31	0.2814	0.3014	0.3	0.2924	0.3014	0.327	0.342	0.226	0.34	0.3114	0.2834
	MCV Fl	44.2	40.9	40.3	57.6	46.9	51.6	41.02	39.25	37.56	39.02	38.25	37.01	39.2	38.3	352	41.02	39.25	37.56
	MCH Pg	18.2	14	16.7	19.9	16.6	18.5	15.02	17.8	16.2	17.55	18.9	16.8	14.4	12.3	11.1	15.02	17.8	16.2
	MCHC %	32.5	31.3	32.8	34.6	35.3	38.6	25.01	29.87	28.65	25.65	28.44	29.25	28.1	28.3	27.8	25.01	29.87	28.65
	Platelets /ul	713000	652000	606000	554000	651000	548000	300	308	460	350	300	410	281000	358000	221000	320	358	460
	WBCs /ul	15300	13900	12000	12200	16000	10500	17.3	16.7	18.9	17.3	16.7	17.4	17100	20.7	19000	17.3	18.4	17.5
	Neutrophils %	2	3	2	5	7	6	2	2	2	1	3	4	2	2	6	2	2	2
	Lymphocytes %	98	95	91	88	85	86	94	96	95	93	92	97	91	93	87	96	95	94
	Monocytes %	8	9	7	5	8	7	7	9	10	8	8	10	7	5	6	6	9	11
	Eosinophils %	1	2	1	2	0	1	1	1	3	1	2	2	0	2	1	1	1	3
	Basophils %	0	0	0	0	0	0	0	0	0	0	0	0	0	0	0	0	0	0
	RDW	14.3	15.5	16	12.7	13.2	12.8	12.71	13.08	14.02	14.11	13.8	14.65	18.1	16.1	15	13.61	16.08	15.02
	MPV	6.2	5.4	5.3	7	6.6	6.7	4.25	5.01	6.02	4.58	5.7	5.1	6.1	6.1	6	4.25	5.01	6.02
	Code-Female	CTRL	CTRL	CTRL	HFD	HFD	HFD	STZ	STZ	STZ	HYX	HYX	HYX	HFD/STZ	HFD/STZ	HFD/STZ	HFD/STZ/HYX	HFD/STZ/HYX	HFD/STZ/HYX
	HB - g/dl	15.01	14.3	13.25	10.36	11.97	10.36	11.8	10.2	11.1	9.67	11.33	9.9	8.5	9.7	7.8	7	7.05	6.1
	RBCs /ul	8.500.000	8.000.000	8.410.000	6.000.000	7.500.00	6.500.00	7500000	8500000	6300000	7.800.000	7030000	7,650,00	5600000	5500000	4.100.000	8.500.00	5,650,00	6000000
	PCV %	0.4936	0.4821	0.4325	0.4012	0.409	0.461	0.511	0.453	0.462	0.42	0.3984	0.451	0.4025	0.495	0.421	0.34	0.3114	0.27341
	MCV Fl	48.21	50.12	46.25	52.36	53.02	44.25	56.6	52.9	51.1	51.02	50.35	49.01	45.36	60.25	52.65	45	42.55	39.586
	MCH Pg	18.9	18.91	17.58	19.11	19.96	16.58	18.9	17.3	16.2	18.95	18.98	17.9	12.3	20.6	17.56	15.02	17.8	15.5
	MCHC %	33.15	32.5	29.54	43.12	44.61	39.25	36.6	37.3	39.4	35	30.34	31.25	30	41.2	41.8	35.9	33.38	30.65
	Platelets /ul	700	610	775	510000	550000	490	600000	550000	500000	490	450	490	460000	300000	410	333	557	500
	WBCs /ul	14.3	11.1	13.65	19.2	18.1	17	22700	19000	19800	19.1	20	19.5	23300	18440	20410	19.3	20.4	17.5
	Neutrophils %	5	4	2	2	4	2	4	4	3	3	4	4	3	2	2	2	2	2
	Lymphocytes %	90	88	79	88	90	88	83	90	93	93	91	90	80	95	93	96	95	94
	Monocytes %	7	5	4	8	9	6	6	8	9	9	8	9	7	9	7	6	9	11
	Eosinophils %	0	1	0	1	0	1	2	0	0	1	2	1	1	2	2	1	1	3
	Basophils %	0	0	0	0	0	0	0	0	0	0	0	0	0	1	1	0	0	0
	RDW	12.71	13.08	13.04	11.02	10.15	10.65	13.3	13.1	11.7	13.5	13.8	11.22	10.3	14	13.1	13.61	16.08	15.02
	MPV	6.1	5.99	5.47	7.36	7.94	6.45	6	7.8	7.7	5.52	5.9	6.17	5.6	8	6.14	5.88	6.01	6.02
Gene expression
		CTR			HFD			STZ			HYX			HFD/STZ			HFD/STZ/HYX
TNF-α	Male	0.43	0.51	0.45	1.93	2.29	2.02	0.7	0.69	0.72	0.67	0.65	0.63	1.5	1.78	1.35	0.86	0.83	0.89
	Female	0.41	0.46	0.44	1.64	1.84	1.76	0.68	0.71	0.69	0.75	0.65	0.63	1.12	1.26	1.21	0.61	0.65	0.59
		CTR			HFD			STZ			HYX			HFD/STZ			HFD/STZ/HYX
IL6	Male	0.54	0.52	0.59	2.16	2.34	2.56	0.97	1.05	0.99	0.88	0.85	0.8	1.64	1.61	1.77	1.08	1.13	1.23
	Female	0.49	0.56	0.51	2.13	1.97	1.99	1.09	1.11	1.24	0.86	0.92	0.97	1.55	1.43	1.41	0.91	0.98	0.99
		CTR			HFD			STZ			HYX			HFD/STZ			HFD/STZ/HYX
IL10	Male	1.06	0.98	1.1	0.64	0.63	0.61	0.6	0.65	0.68	0.94	0.99	0.91	0.44	0.42	0.41	0.3	0.32	0.31
	Female	0.99	1.15	0.95	0.78	0.81	0.79	0.77	0.9	0.85	0.89	0.85	0.87	0.57	0.59	0.63	0.51	0.49	0.46
		CTR			HFD			STZ			HYX			HFD/STZ			HFD/STZ/HYX
leptin	Male	0.66	0.59	0.54	1.1	0.97	0.98	0.99	0.94	0.89	0.59	0.66	0.752	1.59	1.54	1.622	2.3	2.2	2.14
	Female	0.5	0.53	0.59	1.2	1.23	1.29	1.1	1	0.95	0.79	0.76	0.62	1.71	1.74	1.76	2.55	2.42	2.63
Area of islets of Langerhans
	Male	CTR	HYX	HFD	STZ	HFD + STZ	HFD + STZ + HYX
		38963.2	34563.2	30058.7	25693.2	19862.4	18864.3
		30154.3	36593.2	29877.5	24568.1	20145.3	23005.5
		31253.2	32458.4	31000.3	22364.3	21568.6	16584.3
		30329.4	32152.2	27121.1	27997	20563.2	10056.4
		35672.7	38365.2	29898.7	23547.2	18965.3	20223.6
		32154.1	35689.2	30798.1	22789.6	17896.3	11058
		36147.2	35624.9	27788.2	25698.1	20335.1	11000
		34693.2	31258.4	30005.3	24587.6	21356.2	13110.2
		30789.2	32589.3	31022.1	22789.9	18965.3	20116.4
		32324.3	32489.3	26556.7	27854.3	24589.3	15400.5
	Female	CTR	HYX	HFD	STZ	HFD + STZ	HFD + STZ + HYX
		30932.8	31011.5	21062	20364.2	20236.3	20010.1
		32325	36600.6	28632.6	28963.1	18963.2	12022.6
		32839.1	29650.3	18502.7	29137	14563.2	15201.1
		38585.3	31010.1	27554.7	20589.3	16965.2	13111.4
		36159.7	30021.2	25666.5	20348.5	20698.2	16030.4
		26579.1	31000.5	28693.1	25345.2	15635.3	11098.3
		30963.1	28876.9	32589.1	23589.4	20689.3	18553.1
		30789.5	30121.2	28947.2	18965.2	21653.2	21100.2
		28845.7	26878.4	28895.8	19789.2	25368.3	14006.5
The OGTT-area under the curve
	Time	F-CTRL		F-HFD		F-STZ		F-HYX		F-HFD/STZ		F-HFD/STZ/ HYX
	0	80	94	105	122	125	150	90	95	190	206	189	170
	30	150	176	200	231	290	307	170	179	310	313	320	333
	60	125	109	175	191	265	288	130	120	300	295	310	270
	90	120	99	155	178	220	243	120	118	270	284	310	290
	120	85	99	150	135	220	196	95	100	260	253	250	270
	Time	M-CTRL		M-HFD		M-STZ		M-HYX		M-HFD/STZ		M-HFD/STZ/ HYX
	0	80	90	100	110	140	160	95	100	180	187	190	158
	30	160	178	200	221	270	297	190	173	320	340	300	335
	60	125	100	140	162	280	268	130	119	280	296	280	300
	90	110	99	147	129	220	209	120	111	270	233	260	243
	120	90	77	130	110	180	164	111	100	250	185	230	196
Insulin resistance
	Treatment	BloodGM	BloodGF	InsulinM	InsulinF
	CTRL	95	100	6.5	6.5
	CTRL	90	95	6.2	7
	CTRL	100	105	6	7.5
	CTRL	96	102	7	6.5
	CTRL	95	98	5.9	7
	HFD	180	200	4	3
	HFD	165	160	4.5	3.5
	HFD	170	170	5	4.5
	HFD	140	155	4	5
	HFD	160	145	6	3
	HYX	90	80	6.5	6
	HYX	95	85	7	7
	HYX	85	90	6	7.5
	HYX	80	80	7.5	6.5
	HYX	85	75	6	6
	STZ	180	200	4.3	3.5
	STZ	220	230	4	3.5
	STZ	250	210	4.5	4.2
	STZ	230	250	3.5	4
	STZ	245	210	3	3
	HFD/STZ	220	240	3.5	4
	HFD/STZ	250	260	3	4.5
	HFD/STZ	280	300	3.4	3.5
	HFD/STZ	300	280	4	3
	HFD/STZ	240	240	4	3.6
	HFD/STZ/HYX	280	300	5	5
	HFD/STZ/HYX	380	240	4	3
	HFD/STZ/HYX	300	340	4.5	3.5
	HFD/STZ/HYX	240	280	3	4
	HFD/STZ/HYX	220	300	3.5	3.5
